# Supplementary material
Source: PubMed Central journal article supplement (PMC3935798)
Supplement: NIHMS443675-supplement-1_si_001.pdf [file NIHMS443675-supplement-1_si_001.pdf]

## Supporting Information for:

# Mixtures of Supported and Hybrid Lipid Membranes on Heterogeneously Modified Silica Nanoparticles

Aundrea R. Piper-Feldkamp<sup>†</sup>, Maria Wegner<sup>‡</sup>, Peter Brzezinski<sup>‡</sup>, Scott M. Reed<sup>†,\*</sup>

<sup>†</sup> Department of Chemistry, University of Colorado Denver, Campus Box 194, P.O. Box 173364, Denver, CO 80217-3364, Office: 303.556.6260, Fax: 303.556.4776, scott.reed@ucdenver.edu

<sup>‡</sup> Department of Biochemistry and Biophysics, Stockholm Univ., Svante Arrhenius väg 16, SE-106 91, Stockholm, Sweden

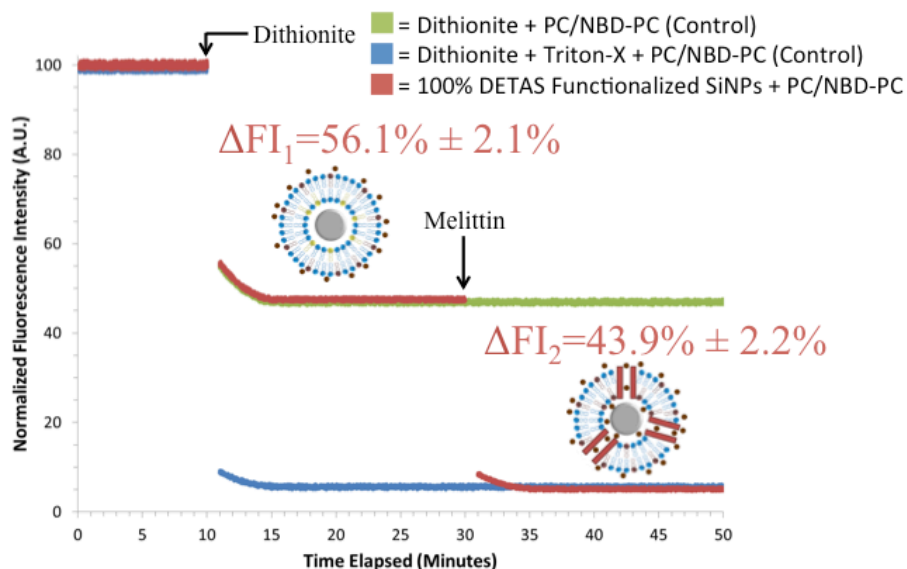

Figure S1. Dithionite quenching assay of PC/NBD-PC coated SiNPs, functionalized with 100% DETAS. Sodium dithionite control (green) was collected by adding 5 mM sodium dithionite to the PC-coated 100% DETAS functionalized SiNP. A complete fluorescence quenching control (blue) was achieved by adding 5 mM sodium dithionite and 0.5 mM Triton-X to the PC-coated functionalized SiNP simultaneously. In the final trial (red), the outer leaflet fluorescence was quenched by the addition of 5 mM sodium dithionite. Then, 1.3  $\mu$ M melittin was added to allow the sodium dithionite quencher access to the inner leaflet.

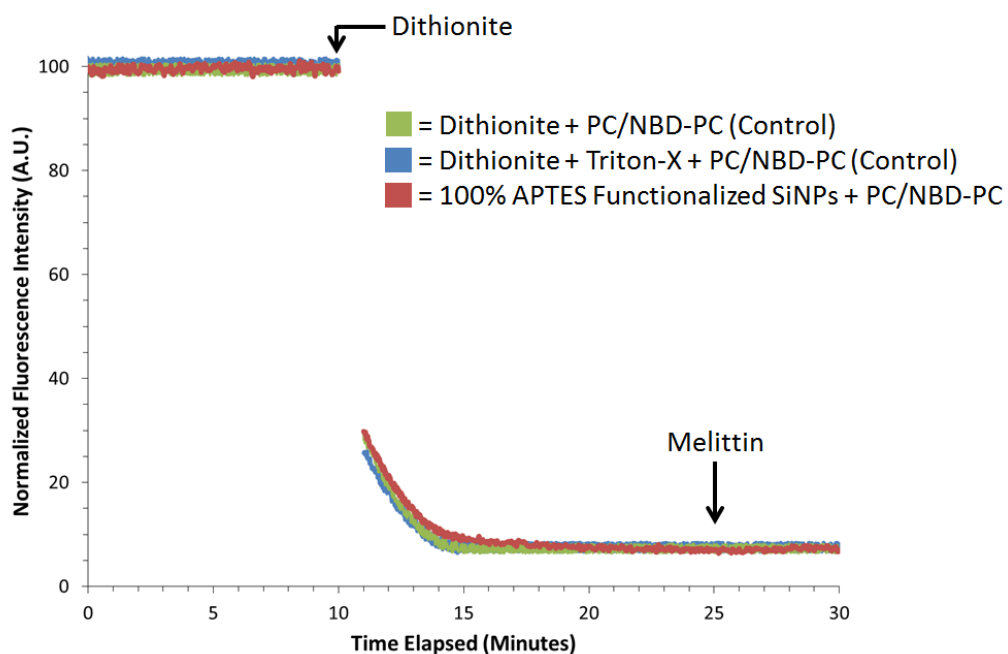

Figure S2. Dithionite quenching assay of PC/NBD-PC coated SiNPs, functionalized with 100% APTES. Sodium dithionite control (green) was collected by adding a final concentration of 5 mM sodium dithionite to the PC-coated 100% APTES functionalized SiNP. A control (blue) was performed by adding 5 mM sodium dithionite and 0.5 mM Triton-X simultaneously to the PC-coated functionalized SiNP. In the final trial (red), the outer leaflet fluorescence was quenched by the addition of 5 mM sodium dithionite and collected for 15 min. Then, a final concentration of 1.3  $\mu$ M melittin was added.

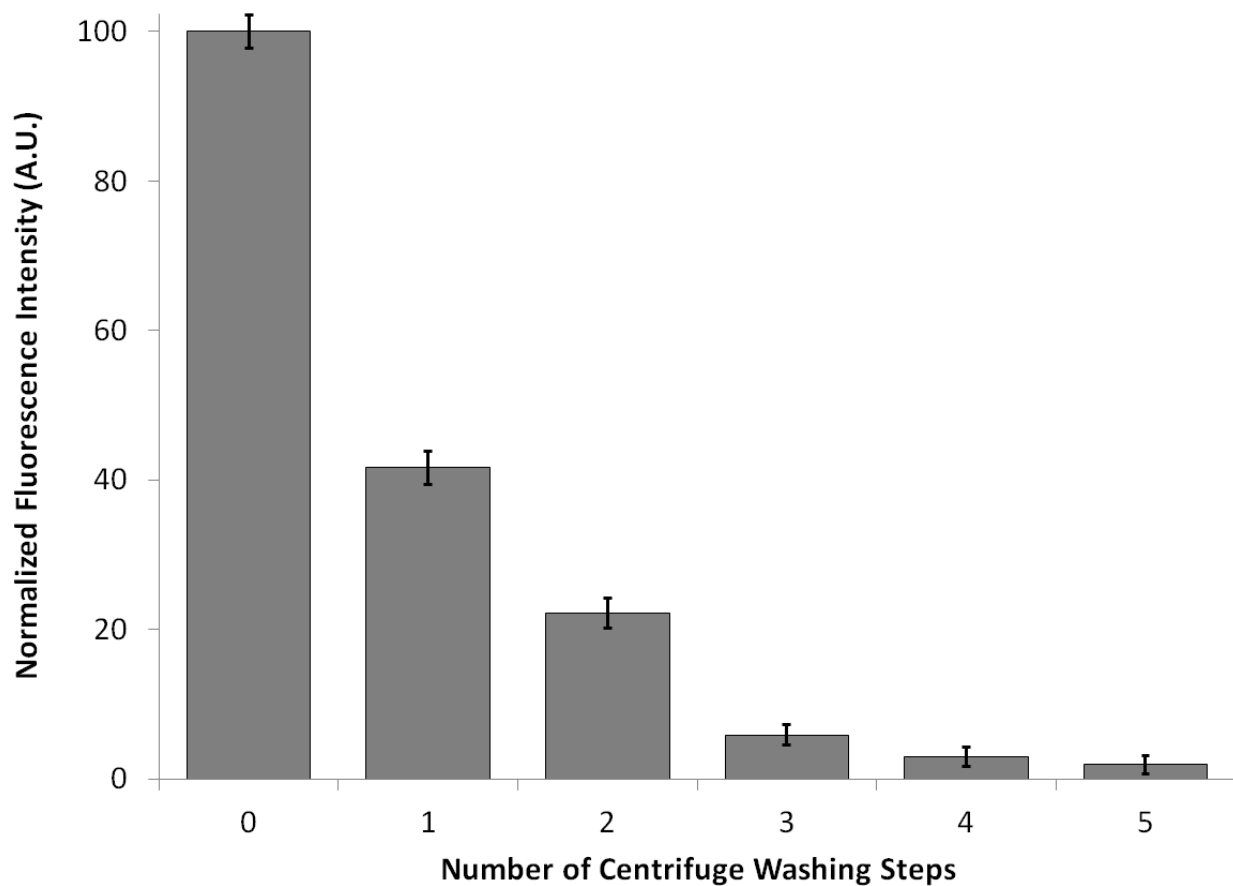

Figure S3. Normalized fluorescence intensity of a mixture of PC-coated nanoparticles mixed with 1% NBD-PC doped SoyPC liposomes demonstrating high purity after 5 washes. Fluorescence is plotted as a function of the number of washing steps via repeated centrifugation and re-suspension, n=3.
